# Supplementary material
Source: publisher figshare collection journal article supplement (https://karger.figshare.com/ndownloader/files/28959552)
Supplement: Supplementary file 1 [file 28959552]

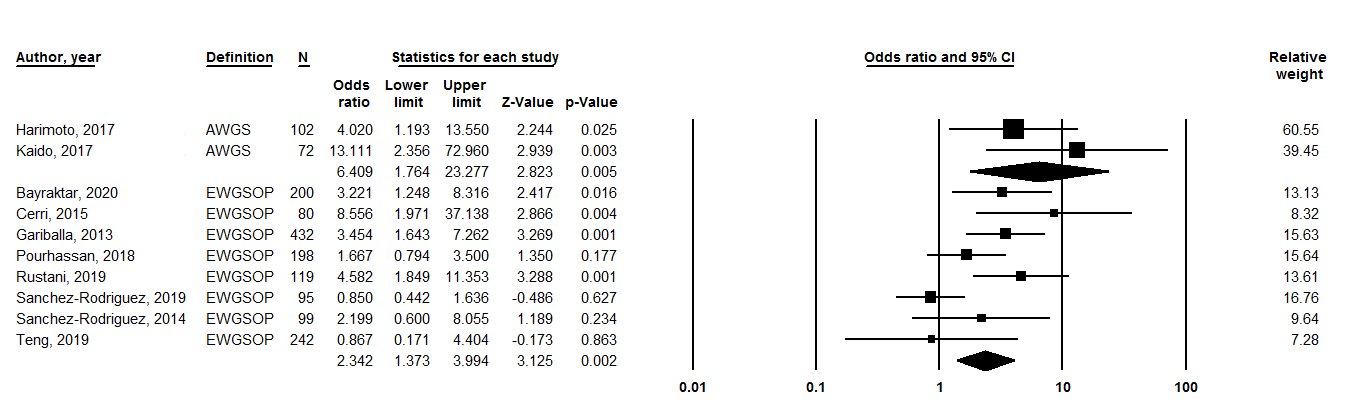
**Supplementary Figure 4.** Meta-analysis of the association between sarcopenia and mortality in inpatients presented in odds ratios, stratified by definition

Heterogeneity (I2): AWGS (17.6%), EWGSOP (60.4%).
AWGS: Asian Working Group for Sarcopenia, EWGSOP: European Working Group on Sarcopenia in Older People 2010
